# Supplementary material
Source: Springer Nature journal article supplement (https://www.springermedizin.de/resource/supplementary/12916_2007_139_MOESM3_ESM.pdf/9599250)
Supplement: MOESM3 [file 9599250]

Sent for second stage eligibility assessment to ORTON Orthopaedic Hospital ( $N = 61$ )

Orthopedic surgeon's clinical and radiological evaluation ( $N = 61$ )

Excluded ( $N = 5$ )

- Did not meet inclusion criteria ( $N = 4$ )
- Refused to participate before randomization ( $N = 1$ )

Randomized ( $N = 56$ )

- **Week 0**

Allocated to arthroscopy and 8-week home exercise program ( $N = 28$ )

**At one week**

Arthroscopy

- Received allocated treatment ( $N = 28$ )

**At three weeks**

Home exercise program

- Received allocated treatment ( $N = 27$ )
  - o One patient started the exercise program at 4 weeks because of knee pain
- Did not receive allocated treatment ( $N = 1$ )
  - o The patient refused to continue after arthroscopy (reason unknown)

Allocated to 8-week home exercise program ( $N = 28$ )

**At three weeks**

Home exercise program

- Received allocated treatment ( $N = 25$ )
- Did not receive allocated treatment ( $N = 3$ )
  - o The first refused to continue after randomization (reason unknown), the second refused during the intervention period (lack of interest, busy with his work), and the third moved abroad (address unknown)

**At 9 months**

Primary follow-up

- Lost to follow-up ( $N = 1$ )
  - o The patient who did not receive the allocated treatment
- 27 patients participated and were analyzed

**At 9 months**

Primary follow-up

- Lost to follow-up ( $N = 3$ )
  - o The patients who did not receive the allocated treatment
- 25 patients participated and were analyzed
  - o Three of them insisted on having an arthroscopy after the home exercise program. Their data were included in the intention-to-treat analysis

**At 24 months**

Secondary follow-up

- Lost to follow-up ( $N = 2$ )
  - o Reasons unknown
- 25 (89%) patients participated and were analyzed

**At 24 months**

Secondary follow-up

- Lost to follow-up ( $N = 2$ )
  - o Reasons unknown
- 23 (82%) patients participated and were analyzed
  - o One of them insisted on having an arthroscopy after 9-month follow-up. The patient's data was included in the intention-to-treat analysis
